# Supplementary material for: Smoking Exposure Is Associated with Serum Vitamin D Deficiency in Children: Evidence from the Japan Environment and Children’s Study
Source: MDPI journal article supplement (doi:10.3390/nu14153121), 2022-07-29
Supplement: s1 [file s1]

## **Supplementary files**

**Table S1.** Baseline characteristics by vitamin D deficiency

**Table S2.** Baseline characteristics by smoking exposure

**Table S3.** Logistic models evaluating the association of tobacco smoke exposure with vitamin D deficiency  
in children age 2 years using the complete dataset

**Table S1.** Baseline characteristics by vitamin D deficiency.

| Variables                                       |                    | Non-VDD |      | VDD  |      |
|-------------------------------------------------|--------------------|---------|------|------|------|
|                                                 |                    | N       | %    | N    | %    |
| Education level of mother                       | High               | 2404    | 69.8 | 754  | 66.8 |
|                                                 | Low                | 1039    | 30.2 | 374  | 33.2 |
| Education level of father                       | High               | 2118    | 61.7 | 656  | 58.4 |
|                                                 | Low                | 1312    | 38.3 | 468  | 41.6 |
| Annual Income of family                         | Normal or high     | 2120    | 64.1 | 657  | 60.8 |
|                                                 | Low                | 1187    | 35.9 | 423  | 39.2 |
| Low birth weight                                | No                 | 3214    | 92.9 | 1043 | 92   |
|                                                 | Yes                | 245     | 7.1  | 91   | 8    |
| Sex of children                                 | Boys               | 1801    | 52.1 | 537  | 47.4 |
|                                                 | Girls              | 1658    | 47.9 | 597  | 52.6 |
| Premature birth                                 | No                 | 3334    | 96.4 | 1081 | 95.3 |
|                                                 | Yes                | 125     | 3.6  | 53   | 4.7  |
| Ages of mother at pregnancy                     | <35                | 2423    | 70.1 | 827  | 72.9 |
|                                                 | ≥35                | 1035    | 29.9 | 307  | 27.1 |
| Exclusive breast milk<br>before and at 6 months | No                 | 2156    | 62.5 | 639  | 56.5 |
|                                                 | Yes                | 1295    | 37.5 | 492  | 43.5 |
| Day nursery                                     | No                 | 1678    | 49.6 | 640  | 57.5 |
|                                                 | Yes                | 1707    | 50.4 | 473  | 42.5 |
| Seasons of 25(OH)D measurement                  | March–May          | 623     | 18   | 375  | 33.1 |
|                                                 | June–August        | 1266    | 36.6 | 175  | 15.4 |
|                                                 | September–November | 1214    | 35.1 | 189  | 16.7 |
|                                                 | December–February  | 356     | 10.3 | 395  | 34.8 |
| Wearing a hat playing outside                   | Yes                | 2650    | 78   | 858  | 77.1 |
|                                                 | No                 | 749     | 22   | 255  | 22.9 |
| Outside play time (hours)                       | <1                 | 1412    | 42   | 648  | 59.3 |
|                                                 | ≥1                 | 1946    | 58   | 444  | 40.7 |
| Parent smoking                                  | No                 | 2464    | 72.9 | 740  | 66.5 |
|                                                 | Yes                | 917     | 27.1 | 372  | 33.5 |

|                              |           |             |             |
|------------------------------|-----------|-------------|-------------|
| Z scores of BMI at 18 months | Mean (SD) | 0.52 (1.12) | 0.37 (1.17) |
|------------------------------|-----------|-------------|-------------|

VDD: Vitamin D deficiency.

**Table S2.** Baseline characteristics by smoking exposure

| Variables                                       |                    | No smoking exposure |      | Passive smoking |      |
|-------------------------------------------------|--------------------|---------------------|------|-----------------|------|
|                                                 |                    | N                   | %    | N               | %    |
| Education level of mother                       | High               | 2390                | 75   | 713             | 55.5 |
|                                                 | Low                | 797                 | 25   | 571             | 44.5 |
| Education level of father                       | High               | 2151                | 67.7 | 577             | 45.1 |
|                                                 | Low                | 1028                | 32.3 | 701             | 54.9 |
| Annual Income of family                         | Normal or high     | 2113                | 68.7 | 615             | 50.5 |
|                                                 | Low                | 962                 | 31.3 | 604             | 49.5 |
| Low birth weight                                | No                 | 2973                | 92.8 | 1189            | 92.2 |
|                                                 | Yes                | 231                 | 7.2  | 100             | 7.8  |
| Sex of children                                 | Boys               | 1647                | 51.4 | 636             | 49.3 |
|                                                 | Girls              | 1557                | 48.6 | 653             | 50.7 |
| Premature birth                                 | No                 | 3077                | 96   | 1241            | 96.3 |
|                                                 | Yes                | 127                 | 4    | 48              | 3.7  |
| Ages of mother at pregnancy                     | <35                | 2202                | 68.7 | 970             | 75.3 |
|                                                 | ≥35                | 1001                | 31.3 | 319             | 24.7 |
| Exclusive breast milk<br>before and at 6 months | No                 | 1909                | 59.7 | 833             | 64.8 |
|                                                 | Yes                | 1288                | 40.3 | 453             | 35.2 |
| Day nursery                                     | No                 | 1657                | 52.4 | 628             | 50   |
|                                                 | Yes                | 1507                | 47.6 | 627             | 50   |
| Seasons of 25(OH)D measurement                  | March–May          | 681                 | 21.3 | 292             | 22.7 |
|                                                 | June–August        | 1018                | 31.8 | 386             | 29.9 |
|                                                 | September–November | 989                 | 30.9 | 393             | 30.5 |
|                                                 | December–February  | 516                 | 16.1 | 218             | 16.9 |
| Wearing a hat playing outside                   | Yes                | 2486                | 78.3 | 954             | 75.8 |
|                                                 | No                 | 689                 | 21.7 | 304             | 24.2 |

|                              |           |             |      |             |      |
|------------------------------|-----------|-------------|------|-------------|------|
| Outside play time (hours)    | <1        | 1450        | 46.3 | 574         | 46.4 |
|                              | >=1       | 1684        | 53.7 | 664         | 53.6 |
| Z scores of BMI at 18 months | Mean (SD) | 0.50 (1.13) |      | 0.45 (1.14) |      |

**Table S3.** Logistic models evaluating the association of tobacco smoke exposure with vitamin D deficiency in children age 2 years using the complete dataset

|                                                            |      | OR   | 95% CI |       | p value |
|------------------------------------------------------------|------|------|--------|-------|---------|
|                                                            |      |      | Lower  | Upper |         |
| Tabaco smoking exposure <sup>#</sup>                       |      |      |        |       |         |
| Model 1 <sup>a</sup>                                       |      | 1.29 | 1.09   | 1.52  | 0.003   |
| Model 2 <sup>b</sup>                                       |      | 1.33 | 1.10   | 1.61  | 0.003   |
| Model 3 <sup>c</sup>                                       |      | 1.32 | 1.09   | 1.60  | 0.004   |
| Number of cigarettes smoked at home (mother) <sup>\$</sup> |      |      |        |       |         |
| Model 1 <sup>a</sup>                                       |      |      |        |       |         |
|                                                            | 1–5  | 1.30 | 0.81   | 2.09  | 0.274   |
|                                                            | 6–10 | 0.76 | 0.42   | 1.36  | 0.351   |
|                                                            | >=11 | 1.13 | 0.55   | 2.34  | 0.744   |
| Model 2 <sup>b</sup>                                       |      |      |        |       |         |
|                                                            | 1–5  | 1.15 | 0.68   | 1.94  | 0.613   |
|                                                            | 6–10 | 0.68 | 0.36   | 1.30  | 0.242   |
|                                                            | >=11 | 1.14 | 0.51   | 2.54  | 0.755   |
| Model 3 <sup>c</sup>                                       |      |      |        |       |         |
|                                                            | 1–5  | 1.15 | 0.68   | 1.95  | 0.607   |
|                                                            | 6–10 | 0.70 | 0.37   | 1.33  | 0.273   |
|                                                            | >=11 | 1.13 | 0.51   | 2.52  | 0.765   |
| Number of cigarettes smoked at home (father) <sup>\$</sup> |      |      |        |       |         |
| Model 1 <sup>a</sup>                                       |      |      |        |       |         |
|                                                            | 1–5  | 1.57 | 1.25   | 1.98  | <0.001  |
|                                                            | 6–10 | 0.99 | 0.72   | 1.36  | 0.965   |
|                                                            | >=11 | 1.17 | 0.81   | 1.69  | 0.403   |
| Model 2 <sup>b</sup>                                       |      |      |        |       |         |
|                                                            | 1–5  | 1.62 | 1.25   | 2.10  | <0.001  |
|                                                            | 6–10 | 1.02 | 0.72   | 1.44  | 0.930   |
|                                                            | >=11 | 1.18 | 0.78   | 1.77  | 0.429   |
| Model 3 <sup>c</sup>                                       |      |      |        |       |         |
|                                                            | 1–5  | 1.60 | 1.23   | 2.08  | <0.001  |
|                                                            | 6–10 | 1.02 | 0.72   | 1.45  | 0.892   |
|                                                            | >=11 | 1.18 | 0.78   | 1.77  | 0.430   |

Models were fitted with logistic regression model. OR odds ratios, CI; confidential inference; <sup>a</sup> Model 1 adjusted sex; <sup>b</sup> Model 2 adjusted sex, education levels of parents, income, low birth weight, premature birth, ages of mother at pregnancy, exclusive breast milk before and at 6 months, day nursery, wearing a hat playing outside, outside play time and season of blood test; <sup>c</sup> Model 3 adjusted sex, education levels of parents, income, low birth weight, premature birth, ages of mother at pregnancy, exclusive breast milk before and at 6 months, day nursery, wearing a hat playing outside, outside play time, season of blood test and z scores of BMI at age 1.5 years; <sup>#</sup>No smoking exposure was used as reference category; <sup>\$</sup>Not smoking at home group was reference group.
